# Supplementary material
Source: Research Square preprint supplement (doi:10.21203/rs.3.rs-9267095/v1)
Supplement: Supplementary file 1 [file 8db2077596d647d220cd5edb.docx]

**Supplementary Table S1: Goodness-of-fit statistics for 4-parameter logistic (4PL) curve fitting of cytokine standard curves.** The 4PL algorithm was performed by the Discovery Workbench 4.0 Analysis Software, using , where A is the minimum detected concentration (fg/mL), B is the hill slope, C is the midpoint and D maximum detected concentration. R² indicates the quality of the fit.

| **Cytokine** | **Plate1** | **R²** | **Parameter A (Minimum)** | **Parameter B (Slope)** | **Parameter C (EC50)** | **Parameter D (Maximum)** |
| --- | --- | --- | --- | --- | --- | --- |
| **IFN-γ** | 1 | 0.999 | 499 | 0.976 | 741874 | 7216499 |
| 2 | 0.998 | 414 | 0.996 | 48454847 | 387013377 |
| **IL-10** | 1 | 0.999 | 521 | 1.02 | 232932 | 1192629 |
| 2 | 0.999 | 547 | 0.897 | 1043239 | 3030172 |
| **IL-12** | 1 | 0.999 | 386 | 0.993 | 843495 | 1835441 |
| 2 | 0.999 | 405 | 0.910 | 3967565 | 5009908 |
| **IL-17** | 1 | 0.999 | 529 | 0.990 | 623936 | 2951849 |
| 2 | 0.999 | 530 | 0.928 | 6189588 | 15856299 |
| **IL-1** **β** | 1 | 0.999 | 705 | 0.965 | 21263608 | 67958418 |
| 2 | 0.999 | 726 | 0.958 | 229810667 | 594953804 |
| **IL-2** | 1 | 0.999 | 504 | 0.959 | 236285485 | 817376633 |
| 2 | 0.999 | 530 | 0.941 | 169165750 | 529613252 |
| **IL-4** | 1 | 0.999 | 354 | 0.922 | 448869 | 2807238 |
| 2 | 0.999 | 388 | 0.877 | 55502681 | 150608993 |
| **IL-6** | 1 | 0.999 | 497 | 0.974 | 144251664 | 1022821536 |
| 2 | 0.999 | 676 | 0.955 | 54346956 | 368542649 |
| **TNF-α** | 1 | 0.999 | 448 | 0.961 | 38930496 | 194864958 |
| 2 | 0.999 | 466 | 0.963 | 60960928 | 280963532 |

1 The plate 1 corresponds to the barcode 2B0AQAB995, the plate 2 corresponds to the barcode 2B0AQAU996
